# Supplementary material for: Maintenance of pluripotency-like signature in the entire ectoderm leads to neural crest stem cell potential
Source: PubMed Central journal article supplement (PMC10518019; doi:10.1038/s41467-023-41384-6), 2023-09-23
Supplement: 41467_2023_41384_MOESM3_ESM.pdf [file 41467_2023_41384_MOESM3_ESM.pdf]

## Description of Additional Supplementary Files

**Supplementary Data 1:** Up regulated gene list and their p-adj, p-values along with LFC for time series bulk RNAseq data

**Supplementary Data 2:** Down regulated gene list and their p-adj, p-values along with LFC for time series bulk RNAseq data

**Supplementary Data 3:** Differentially expressed gene list and their p-adj, p-values along with LFC for scRNAseq data (germ layers)

**Supplementary Data 4:** Differentially expressed gene list and their p-adj, p-values along with LFC for scRNAseq data (Pan Ectodermal cells vs Others)

**Supplementary Data 5:** MO bulk RNAseq commonly differentially expressed genes among all three MO

**Supplementary Data 6:** Box Plot statistics for Supplementary Figure 7

**Supplementary Data 7:** All probe sequences used for scMST experiments.

**Supplementary Data 8:** key resources table
