# Supplementary material for: Maintenance of pluripotency-like signature in the entire ectoderm leads to neural crest stem cell potential
Source: Nat Commun. 2023 Sep 23;14:5941. doi: 10.1038/s41467-023-41384-6 (PMC10518019; doi:10.1038/s41467-023-41384-6)
Supplement: Supplementary file 6 — Supplementary Data 3 [file 41467_2023_41384_MOESM6_ESM.xlsx]

## Sheet: Table S1 (Recovered) -top100
	p_val	avg_log2FC	pct.1	pct.2	p_val_adj	cluster	gene
FRZB	0	1.96189	0.799	0.348	0	Ectoderm	FRZB
PLPP1	0	1.94388	0.588	0.296	0	Ectoderm	PLPP1
SFRP2	0	1.8602	0.77	0.294	0	Ectoderm	SFRP2
CLDN1	0	1.69136	0.7	0.192	0	Ectoderm	CLDN1
SOX21	0	1.56795	0.578	0.098	0	Ectoderm	SOX21
HES5	0	1.47347	0.332	0.012	0	Ectoderm	HES5
LMO1	0	1.36383	0.537	0.131	0	Ectoderm	LMO1
LDHB	0	1.22682	0.997	0.975	0	Ectoderm	LDHB
HESX1	0	1.16943	0.546	0.274	0	Ectoderm	HESX1
YEATS4	0	1.1628	0.804	0.575	0	Ectoderm	YEATS4
FABP3	0	1.14887	0.439	0.146	0	Ectoderm	FABP3
AP1S3	0	1.10781	0.835	0.61	0	Ectoderm	AP1S3
CYP26A1	0	1.09111	0.37	0.098	0	Ectoderm	CYP26A1
TFAP2A	0	1.04258	0.287	0.013	0	Ectoderm	TFAP2A
EPCAM	0	0.973954	0.854	0.675	0	Ectoderm	EPCAM
NT5DC2	0	0.963465	0.86	0.637	0	Ectoderm	NT5DC2
FABP5	0	0.954178	0.785	0.439	0	Ectoderm	FABP5
TUBB3	0	0.953075	0.859	0.546	0	Ectoderm	TUBB3
ENSGALG00000026754	0	0.932463	0.415	0.051	0	Ectoderm	ENSGALG00000026754
ENSGALG00000001136	0	0.928293	0.234	0.011	0	Ectoderm	ENSGALG00000001136
CKB	0	0.917593	0.54	0.261	0	Ectoderm	CKB
ENSGALG00000030512	0	0.910343	0.375	0.062	0	Ectoderm	ENSGALG00000030512
MARCKSL1	0	0.903517	0.967	0.887	0	Ectoderm	MARCKSL1
LARP7	0	0.887876	0.88	0.695	0	Ectoderm	LARP7
UCHL1	0	0.885127	0.951	0.699	0	Ectoderm	UCHL1
CMTM8	0	0.865505	0.859	0.553	0	Ectoderm	CMTM8
MAP1B	0	0.857343	0.62	0.346	0	Ectoderm	MAP1B
MFGE8	0	0.844979	0.614	0.351	0	Ectoderm	MFGE8
MRAS	0	0.841154	0.543	0.254	0	Ectoderm	MRAS
NSG1	0	0.838853	0.72	0.438	0	Ectoderm	NSG1
THOC7	0	0.797716	0.989	0.963	0	Ectoderm	THOC7
PRDX1	0	0.736968	0.995	0.987	0	Ectoderm	PRDX1
ACOT7	0	0.727405	0.743	0.524	0	Ectoderm	ACOT7
ITGA6	0	0.712077	0.328	0.076	0	Ectoderm	ITGA6
RNH1	0	0.708192	0.739	0.523	0	Ectoderm	RNH1
SPOCK3	0	0.689255	0.389	0.123	0	Ectoderm	SPOCK3
VSTM2L	0	0.685804	0.388	0.142	0	Ectoderm	VSTM2L
XPA	0	0.67371	0.866	0.759	0	Ectoderm	XPA
DUSP14	0	0.668459	0.576	0.327	0	Ectoderm	DUSP14
MOXD1	0	0.653793	0.321	0.068	0	Ectoderm	MOXD1
OTX2	0	0.645692	0.452	0.157	0	Ectoderm	OTX2
MAFA	0	0.638965	0.324	0.076	0	Ectoderm	MAFA
SMIM4	0	0.633474	0.831	0.707	0	Ectoderm	SMIM4
SPON1	0	0.618251	0.397	0.15	0	Ectoderm	SPON1
HK1	0	0.616381	0.67	0.437	0	Ectoderm	HK1
KCNAB1	0	0.616311	0.282	0.047	0	Ectoderm	KCNAB1
GNG2	0	0.607796	0.802	0.613	0	Ectoderm	GNG2
HMGB1	0	0.606593	0.999	0.997	0	Ectoderm	HMGB1
PDCD4	0	0.597884	0.866	0.751	0	Ectoderm	PDCD4
PKLR	0	0.584742	0.991	0.962	0	Ectoderm	PKLR
APOA1	0	4.18298	0.942	0.416	0	Endoderm	APOA1
ENSGALG00000006944	0	3.89201	0.899	0.085	0	Endoderm	ENSGALG00000006944
HHEX	0	3.15023	0.579	0.085	0	Endoderm	HHEX
SOX17	0	2.71991	0.54	0.01	0	Endoderm	SOX17
FGB	0	2.64407	0.27	0.008	0	Endoderm	FGB
MYL4	0	2.52936	0.922	0.385	0	Endoderm	MYL4
KRT18	0	2.15159	0.788	0.39	0	Endoderm	KRT18
KRT7	0	2.14315	0.758	0.262	0	Endoderm	KRT7
CLDN3	0	2.10183	0.78	0.261	0	Endoderm	CLDN3
EZR	0	2.07422	0.845	0.311	0	Endoderm	EZR
CDH2	0	1.94061	0.83	0.487	0	Endoderm	CDH2
APOC3	0	1.83382	0.6	0.232	0	Endoderm	APOC3
ENSGALG00000019233	0	1.58659	0.465	0.012	0	Endoderm	ENSGALG00000019233
FOXA2	0	1.58634	0.656	0.053	0	Endoderm	FOXA2
GPC3	0	1.56885	0.439	0.062	0	Endoderm	GPC3
FBLN1	0	1.50514	0.674	0.256	0	Endoderm	FBLN1
CXCR4	0	1.41387	0.476	0.114	0	Endoderm	CXCR4
KRT24	0	1.32258	0.909	0.692	0	Endoderm	KRT24
SERTM1	0	1.18775	0.511	0.128	0	Endoderm	SERTM1
PCBD1	0	1.17707	0.872	0.577	0	Endoderm	PCBD1
COTL1	0	1.14848	0.85	0.59	0	Endoderm	COTL1
RDH10	0	1.14393	0.367	0.048	0	Endoderm	RDH10
NDRG1	0	1.14107	0.475	0.154	0	Endoderm	NDRG1
FOXA1	0	1.08615	0.319	0.066	0	Endoderm	FOXA1
GATA6	0	1.06301	0.348	0.081	0	Endoderm	GATA6
LIFR	0	1.05683	0.392	0.059	0	Endoderm	LIFR
PLCXD1	0	1.04644	0.373	0.036	0	Endoderm	PLCXD1
GATA5	0	1.04203	0.504	0.112	0	Endoderm	GATA5
OSBPL8	0	1.03042	0.476	0.125	0	Endoderm	OSBPL8
PLXNB2	0	0.941253	0.435	0.115	0	Endoderm	PLXNB2
TTC36	0	0.890317	0.35	0.039	0	Endoderm	TTC36
TTC9	0	0.886308	0.382	0.066	0	Endoderm	TTC9
EYA2	0	0.885083	0.395	0.101	0	Endoderm	EYA2
PGA3	0	0.755116	0.228	0.034	0	Endoderm	PGA3
BMP2	0	0.728252	0.29	0.056	0	Endoderm	BMP2
HES1	2.32764e-296	0.771652	0.401	0.117	3.38951e-292	Endoderm	HES1
HMCN1	2.0494e-293	0.633904	0.297	0.065	2.98433e-289	Endoderm	HMCN1
GSC	1.57372e-289	0.896964	0.343	0.086	2.29165e-285	Endoderm	GSC
FN1	6.18008e-289	2.04887	0.708	0.421	8.99943e-285	Endoderm	FN1
IGSF21	1.81399e-286	0.925533	0.415	0.128	2.64153e-282	Endoderm	IGSF21
CSRP2	9.84084e-279	1.30157	0.508	0.194	1.43302e-274	Endoderm	CSRP2
RHOC	9.3743e-278	0.453324	0.215	0.034	1.36509e-273	Endoderm	RHOC
RARB	6.98074e-274	0.702772	0.308	0.074	1.01654e-269	Endoderm	RARB
LGMN	1.69274e-264	1.15688	0.672	0.373	2.46497e-260	Endoderm	LGMN
ENSGALG00000011687	1.67308e-261	1.11091	0.28	0.064	2.43635e-257	Endoderm	ENSGALG00000011687
EOMES	5.08909e-261	0.583792	0.224	0.041	7.41073e-257	Endoderm	EOMES
GJB6	1.58367e-253	0.647561	0.217	0.039	2.30614e-249	Endoderm	GJB6
PHLDA2	3.40247e-249	1.3979	0.524	0.234	4.95468e-245	Endoderm	PHLDA2
TRABD2B	4.82093e-249	0.793895	0.473	0.179	7.02024e-245	Endoderm	TRABD2B
CLSTN1	1.27514e-248	0.932383	0.78	0.519	1.85686e-244	Endoderm	CLSTN1
MCUB	5.23209e-243	0.920132	0.518	0.229	7.61897e-239	Endoderm	MCUB
APLP2	2.25008e-239	0.948476	0.797	0.518	3.27656e-235	Endoderm	APLP2
NAV21	0.000434397	0.243343	0.325	0.309	1	Endoderm	NAV2
PITX2	0	2.83924	0.592	0.057	0	Mesoderm	PITX2
TWIST1	0	2.22466	0.762	0.022	0	Mesoderm	TWIST1
PRRX1	0	2.09383	0.745	0.046	0	Mesoderm	PRRX1
GATA51	0	2.00726	0.451	0.065	0	Mesoderm	GATA5
OLFML3	0	1.95806	0.771	0.181	0	Mesoderm	OLFML3
ACTA2	0	1.89656	0.263	0.001	0	Mesoderm	ACTA2
AGRP	0	1.73487	0.273	0.011	0	Mesoderm	AGRP
AKAP12	0	1.72762	0.844	0.499	0	Mesoderm	AKAP12
RBM24	0	1.60577	0.561	0.176	0	Mesoderm	RBM24
RBPMS2	0	1.5692	0.444	0.058	0	Mesoderm	RBPMS2
SIX11	0	1.55876	0.661	0.224	0	Mesoderm	SIX1
CSRP1	0	1.51081	0.765	0.402	0	Mesoderm	CSRP1
ALX1	0	1.45582	0.391	0.007	0	Mesoderm	ALX1
ENSGALG000000086351	0	1.42919	0.33	0.042	0	Mesoderm	ENSGALG00000008635
TPM41	0	1.4142	0.752	0.423	0	Mesoderm	TPM4
CLEC19A	0	1.38096	0.676	0.194	0	Mesoderm	CLEC19A
KRT71	0	1.34936	0.77	0.182	0	Mesoderm	KRT7
COLEC12	0	1.32345	0.563	0.064	0	Mesoderm	COLEC12
TNNI1	0	1.30814	0.538	0.143	0	Mesoderm	TNNI1
FKBP1B	0	1.29299	0.427	0.171	0	Mesoderm	FKBP1B
COL1A1	0	1.29286	0.504	0.059	0	Mesoderm	COL1A1
TNNT2	0	1.26317	0.255	0.007	0	Mesoderm	TNNT2
TUBB61	0	1.21715	0.719	0.254	0	Mesoderm	TUBB6
CFC11	0	1.10415	0.354	0.127	0	Mesoderm	CFC1
NKX2-5	0	1.08243	0.298	0.057	0	Mesoderm	NKX2-5
ECRG4	0	1.02407	0.468	0.112	0	Mesoderm	ECRG4
ENSGALG00000015349	0	1.01916	0.304	0.068	0	Mesoderm	ENSGALG00000015349
EXOC6	0	1.01662	0.56	0.344	0	Mesoderm	EXOC6
APLP21	0	1.00323	0.816	0.47	0	Mesoderm	APLP2
CDH11	0	0.989187	0.669	0.322	0	Mesoderm	CDH11
ACTC1	0	0.979484	0.283	0.052	0	Mesoderm	ACTC1
ENSGALG00000050728	0	0.969447	0.451	0.114	0	Mesoderm	ENSGALG00000050728
JCAD1	0	0.967812	0.415	0.081	0	Mesoderm	JCAD
CD24	0	0.934286	0.868	0.748	0	Mesoderm	CD24
IRX6	0	0.908119	0.297	0.02	0	Mesoderm	IRX6
SCGN	0	0.898454	0.373	0.075	0	Mesoderm	SCGN
GATA61	0	0.87489	0.322	0.047	0	Mesoderm	GATA6
SPARC	0	0.874566	0.765	0.546	0	Mesoderm	SPARC
SEPTIN11	0	0.855602	0.606	0.263	0	Mesoderm	SEPTIN11
KRT181	0	0.811937	0.705	0.35	0	Mesoderm	KRT18
PERP21	0	0.810558	0.336	0.089	0	Mesoderm	PERP2
SMAD61	0	0.792388	0.377	0.13	0	Mesoderm	SMAD6
PRTG1	0	0.774412	0.777	0.491	0	Mesoderm	PRTG
EPB41L31	0	0.758635	0.378	0.066	0	Mesoderm	EPB41L3
MARCKS	0	0.75531	0.808	0.576	0	Mesoderm	MARCKS
TSPAN181	0	0.748937	0.416	0.101	0	Mesoderm	TSPAN18
ENSGALG00000001805	0	0.74783	0.47	0.163	0	Mesoderm	ENSGALG00000001805
SDC4	0	0.737173	0.381	0.121	0	Mesoderm	SDC4
KLHL18	0	0.73507	0.503	0.221	0	Mesoderm	KLHL18
ATOH8	0	0.731876	0.382	0.076	0	Mesoderm	ATOH8
SPOCK1	0	0.71808	0.335	0.027	0	Mesoderm	SPOCK1
FZD2	0	0.707972	0.351	0.053	0	Mesoderm	FZD2
CHRD1	0	4.5735	0.87	0.059	0	Notochord	CHRD
POSTN	0	3.66692	0.692	0.017	0	Notochord	POSTN
TBXT1	0	3.58552	0.952	0.056	0	Notochord	TBXT
SHH	0	2.18416	0.788	0.028	0	Notochord	SHH
MNX1	0	2.10696	0.815	0.01	0	Notochord	MNX1
NOG	0	1.84499	0.685	0.031	0	Notochord	NOG
LEFTY1	0	1.58172	0.288	0.001	0	Notochord	LEFTY1
WIF1	0	1.42834	0.548	0.008	0	Notochord	WIF1
CAPSL	0	1.40581	0.479	0.014	0	Notochord	CAPSL
FAM163B	0	1.33131	0.555	0.026	0	Notochord	FAM163B
ENSGALG00000054418	0	1.31856	0.534	0.017	0	Notochord	ENSGALG00000054418
FLT4	0	1.2643	0.527	0.018	0	Notochord	FLT4
ITGBL1	0	1.20837	0.486	0.01	0	Notochord	ITGBL1
NTN1	0	1.18031	0.555	0.02	0	Notochord	NTN1
LY86	0	0.789433	0.342	0.007	0	Notochord	LY86
ZNF385B	0	0.623913	0.308	0.007	0	Notochord	ZNF385B
NPY7R	0	0.542116	0.233	0.004	0	Notochord	NPY7R
SEMA3E	0	0.507818	0.24	0.003	0	Notochord	SEMA3E
TF1	5.87044e-277	2.15126	0.74	0.057	8.54854e-273	Notochord	TF
TIMP3	1.70523e-272	2.97658	0.767	0.065	2.48316e-268	Notochord	TIMP3
C9H2ORF82	3.21144e-270	2.0805	0.74	0.059	4.6765e-266	Notochord	C9H2ORF82
MYO3A	3.4203e-266	1.72034	0.651	0.044	4.98063e-262	Notochord	MYO3A
SEMA3D	3.04661e-252	1.80094	0.589	0.038	4.43648e-248	Notochord	SEMA3D
IGFBP5	2.54955e-245	1.08803	0.452	0.022	3.71265e-241	Notochord	IGFBP5
NOTO	1.06428e-233	1.10071	0.521	0.031	1.5498e-229	Notochord	NOTO
FOXA11	7.41765e-207	1.80173	0.781	0.084	1.08016e-202	Notochord	FOXA1
ST8SIA5	1.03499e-203	0.628947	0.253	0.008	1.50716e-199	Notochord	ST8SIA5
TGFB21	9.92123e-195	2.80394	0.87	0.128	1.44473e-190	Notochord	TGFB2
SMOC1	8.87613e-193	1.83111	0.61	0.055	1.29254e-188	Notochord	SMOC1
DENND5B	1.09537e-188	0.635494	0.295	0.012	1.59508e-184	Notochord	DENND5B
POMC1	2.18843e-178	4.60764	0.911	0.159	3.18679e-174	Notochord	POMC
SMPD3	1.31081e-173	0.672942	0.336	0.017	1.9088e-169	Notochord	SMPD3
CHGA	4.70837e-172	1.67536	0.507	0.041	6.85633e-168	Notochord	CHGA
SLIT31	1.98012e-162	1.77648	0.74	0.1	2.88345e-158	Notochord	SLIT3
B4GALT5	1.44247e-158	0.587552	0.281	0.013	2.10052e-154	Notochord	B4GALT5
MTSS1	4.97025e-158	1.51037	0.637	0.073	7.23768e-154	Notochord	MTSS1
ENSGALG00000007522	1.72022e-157	0.947447	0.432	0.032	2.50499e-153	Notochord	ENSGALG00000007522
SNX30	2.10673e-153	1.50511	0.651	0.078	3.06782e-149	Notochord	SNX30
PTGDS1	3.78412e-150	2.47528	0.781	0.123	5.51044e-146	Notochord	PTGDS
ITPK1	1.31391e-149	2.33256	0.952	0.211	1.91332e-145	Notochord	ITPK1
DRD41	1.4418e-139	1.49676	0.671	0.089	2.09954e-135	Notochord	DRD4
PLA2G15	2.03057e-139	0.844537	0.39	0.029	2.95692e-135	Notochord	PLA2G15
TMEM132B	3.85015e-139	0.952543	0.384	0.029	5.60659e-135	Notochord	TMEM132B
GDPD5	4.17244e-138	0.726776	0.356	0.025	6.07591e-134	Notochord	GDPD5
NBL11	3.74691e-130	2.74418	0.986	0.303	5.45625e-126	Notochord	NBL1
LMO7	9.8882e-122	0.981083	0.473	0.049	1.43992e-117	Notochord	LMO7
ISM1	3.2238e-114	0.750566	0.301	0.021	4.69449e-110	Notochord	ISM1
RHOC1	2.03176e-112	0.867374	0.452	0.048	2.95865e-108	Notochord	RHOC
CSTA	1.4772e-108	0.805714	0.342	0.029	2.1511e-104	Notochord	CSTA
STK38L1	6.15485e-97	1.69448	0.849	0.232	8.9627e-93	Notochord	STK38L
RP2	7.97987e-92	0.961107	0.507	0.073	1.16203e-87	Notochord	RP2
