# Supplementary material for: Maintenance of pluripotency-like signature in the entire ectoderm leads to neural crest stem cell potential
Source: Nat Commun. 2023 Sep 23;14:5941. doi: 10.1038/s41467-023-41384-6 (PMC10518019; doi:10.1038/s41467-023-41384-6)
Supplement: Supplementary file 8 — Supplementary Data 5 [file 41467_2023_41384_MOESM8_ESM.xlsx]

## Sheet: SupTable 2 (DE genes)
Commonly DE genes in MO Nanog, PouV(Oct4) and Klf4
Ensembl id	Gene Symbol
ENSGALG00000032270	NCAPH
ENSGALG00000002430	SMN
ENSGALG00000012304	NFKB1
ENSGALG00000003108	SMG6
ENSGALG00000003731	FBXO42
ENSGALG00000008889	TTC14
ENSGALG00000028140	CNTFR
ENSGALG00000025996	MKI67
ENSGALG00000010623	ORC1
ENSGALG00000014791	WDR3
ENSGALG00000011400	USP44
ENSGALG00000008969	EPCAM
ENSGALG00000007609	ARHGAP19
ENSGALG00000003473	SFRP1
ENSGALG00000035201	HSPA14
ENSGALG00000007361	SST
ENSGALG00000002473	GPR157
ENSGALG00000030351	ILF3
ENSGALG00000001000	HSPA5
ENSGALG00000000452	TNFRSF10B
ENSGALG00000012020	KIAA1549L
ENSGALG00000031094	EDA2R
ENSGALG00000008475	ARRDC1
ENSGALG00000002789	MAP2
ENSGALG00000010497	SLC29A4
ENSGALG00000028318	CDKN1A
ENSGALG00000014170	MOGAT2
ENSGALG00000027963	COX7C
ENSGALG00000033231	RACGAP1
ENSGALG00000014833	RPL37
ENSGALG00000000436	RABIF
ENSGALG00000027695	PCBP4
ENSGALG00000054473	SLC13A3
ENSGALG00000005269	INTS2
ENSGALG00000000218	SRP19
ENSGALG00000007537	INCENP
ENSGALG00000015704	TXN
ENSGALG00000010675	PSMC1
ENSGALG00000013510	UTP15
ENSGALG00000043034	KIFC3
ENSGALG00000004850	ZMIZ1
ENSGALG00000041347	PROM2
ENSGALG00000041255	ADAM12
ENSGALG00000043128	ARHGEF10L
ENSGALG00000029944	FAM222A
ENSGALG00000034590	CELF2
ENSGALG00000029135	YEATS4
ENSGALG00000015002	MRPS27
ENSGALG00000001171	SEMA6B
ENSGALG00000028484	TMED7
ENSGALG00000015286	SESN1
ENSGALG00000012610	CTSV
ENSGALG00000013607	FBXO5
ENSGALG00000026225	PSMD12
ENSGALG00000012836	PRC1
ENSGALG00000007334	ABAT
ENSGALG00000009157	ECT2
ENSGALG00000003373	BRIX1
ENSGALG00000013990	RPS12
ENSGALG00000049193	IQGAP3
ENSGALG00000035760	LENG8
ENSGALG00000009192	SLITRK2
ENSGALG00000028675	ZCCHC7
ENSGALG00000013208	CENPE
ENSGALG00000006997	BRINP1
ENSGALG00000034271	UHRF1
ENSGALG00000005652	DIDO1
ENSGALG00000012165	DLGAP5
ENSGALG00000039032	FJX1
ENSGALG00000029921	CSRP2
ENSGALG00000023066	DNAJA1
ENSGALG00000003748	ANO5
ENSGALG00000029789	PPP1R2
ENSGALG00000001141	HES5
ENSGALG00000016003	DDRGK1
ENSGALG00000013764	AASDH
ENSGALG00000040465	ZEB2
ENSGALG00000013420	FOXM1
ENSGALG00000008233	BUB1
ENSGALG00000001480	INKA2
ENSGALG00000004627	LAMC2
ENSGALG00000030016	CTSB
ENSGALG00000029999	CCDC102A
ENSGALG00000028026	NDUFS4
ENSGALG00000044404	FAM83D
ENSGALG00000021362	GPRC5C
ENSGALG00000026028	SREK1IP1
ENSGALG00000037269	PLEKHH3
ENSGALG00000043198	SPEG
ENSGALG00000033862	TXNL1
ENSGALG00000042929	LOC107049146
ENSGALG00000041238	LOC417113
